# Supplementary material for: Group-based, person-centered diabetes self-management education: healthcare professionals’ implementation of new approaches
Source: Springer Nature journal article supplement (doi:10.1186/s12913-019-4183-1), 2019-06-11
Supplement: MOESM1 [file 16797146]

# WHO AM I?

Name, position/hobbies  
and duration of diabetes?

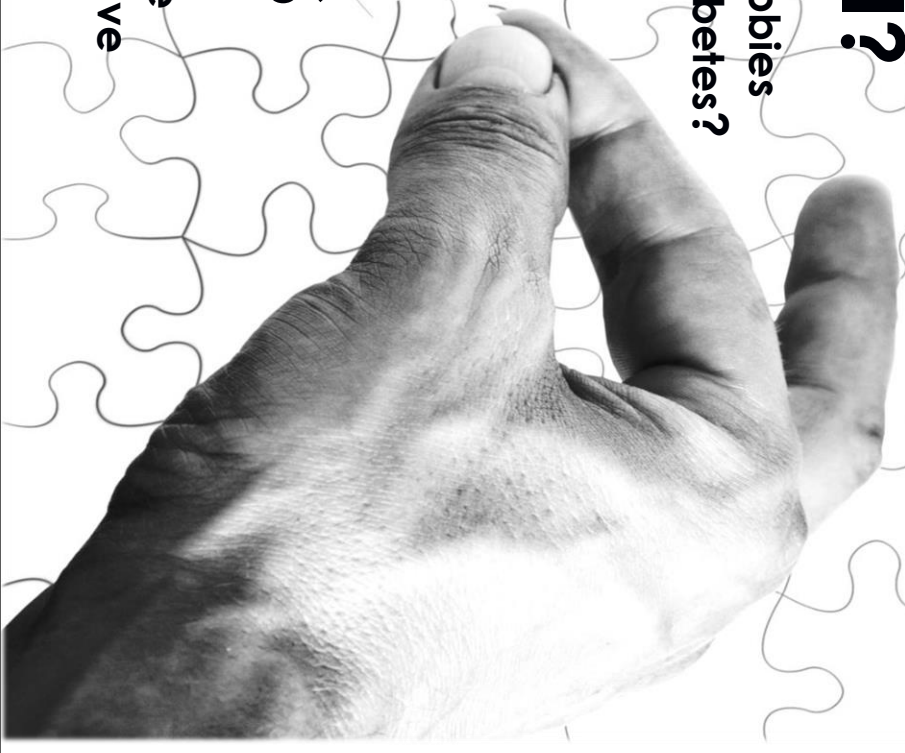

# MY DIABETES

What significance  
does diabetes have  
in my daily life?

# MY ANSWER

---

---

---

---

---
