# Supplementary material for: Group-based, person-centered diabetes self-management education: healthcare professionals’ implementation of new approaches
Source: Springer Nature journal article supplement (doi:10.1186/s12913-019-4183-1), 2019-06-11
Supplement: MOESM2 [file 16797146]

## Supplementary file 2. Tool to facilitate reflection and dialog about exercise habits

### MY EXERCISE HABITS

A number of situations are described below that can make it hard to stick to exercising regularly. Please circle the scale below. How strongly do you agree with the following statements?

| I find it difficult to exercise...                                                           | Strongly disagree | 0 | 1 | 2 | 3 | 4 | 5 | 6 | 7 | 8 | 9  | 10 | Strongly agree |
|----------------------------------------------------------------------------------------------|-------------------|---|---|---|---|---|---|---|---|---|----|----|----------------|
| ...when I am in a bad mood (tired, experiencing personal problems, feeling low or depressed) | 0                 | 1 | 2 | 3 | 4 | 5 | 6 | 7 | 8 | 9 | 10 |    |                |
| ... when it is inconvenient (poor weather, traveling, having visitors, gym is closed)        | 0                 | 1 | 2 | 3 | 4 | 5 | 6 | 7 | 8 | 9 | 10 |    |                |
| ...when it is not part of my daily tasks                                                     | 0                 | 1 | 2 | 3 | 4 | 5 | 6 | 7 | 8 | 9 | 10 |    |                |
| ...when I am busy (pressure from work, too much work at home, family responsibilities)       | 0                 | 1 | 2 | 3 | 4 | 5 | 6 | 7 | 8 | 9 | 10 |    |                |
| ...when I have to exercise alone                                                             | 0                 | 1 | 2 | 3 | 4 | 5 | 6 | 7 | 8 | 9 | 10 |    |                |
| ...if I don't reach my exercise goals                                                        | 0                 | 1 | 2 | 3 | 4 | 5 | 6 | 7 | 8 | 9 | 10 |    |                |
| ...after recovering from illness or after vacation                                           | 0                 | 1 | 2 | 3 | 4 | 5 | 6 | 7 | 8 | 9 | 10 |    |                |
| ... when I feel physical discomfort when I exercise                                          | 0                 | 1 | 2 | 3 | 4 | 5 | 6 | 7 | 8 | 9 | 10 |    |                |

Where do I score high?

How can I act differently in the future?

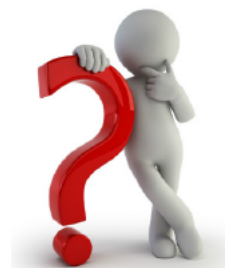

**Discuss in the group:**

1. When is it particularly difficult to exercise?
2. Suggestions to make it easier in the future?

**Facilitator tips:**

1. Highlight and link participants with similar concerns and solutions in the group
2. Summarize similar issues to help participants see topics in a new way by hearing and considering new ideas and perspectives from others having the same challenges
