# Supplementary material for: Group-based, person-centered diabetes self-management education: healthcare professionals’ implementation of new approaches
Source: Springer Nature journal article supplement (doi:10.1186/s12913-019-4183-1), 2019-06-11
Supplement: MOESM3 [file 16797146]

## Supplementary file 3. Tool to facilitate reflection and dialog about eating habits

### MY EATING HABITS

Eating is normally more influenced by the principles of pleasure and social interaction. Please circle the scale below. How strongly do you agree with the following statements?

#### My eating habits depend on...

|                                                                                | Strongly disagree |   |   |   |   |   | Strongly agree |
|--------------------------------------------------------------------------------|-------------------|---|---|---|---|---|----------------|
| ...my emotions (boredom, loneliness, sadness, reward, guilt, anger, happiness) | 0                 | 1 | 2 | 3 | 4 | 5 | 6              |
| ...my physical discomfort (stress, tiredness, exhaustion, pain)                | 0                 | 1 | 2 | 3 | 4 | 5 | 6              |
| ...my daily routines (TV, reading, late at night)                              | 0                 | 1 | 2 | 3 | 4 | 5 | 6              |
| ...availability or social life (friends, family, weekends, holiday)            | 0                 | 1 | 2 | 3 | 4 | 5 | 6              |

#### Try to describe the certain events that trigger your unhelpful eating habits?

(Emotions, physical discomfort, daily routines, availability or social life?)

#### How can you manage your eating habits differently?

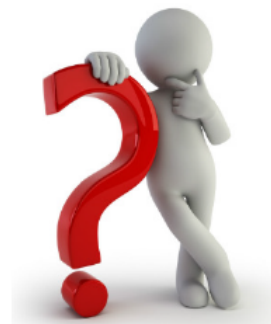

#### Discuss in the group:

1. Triggers to food?
2. Alternative activities to food?

#### Facilitator tips:

1. Highlight and link participants with similar concerns and solutions in the group
2. Summarize similar issues to help participants see topics in a new way by hearing and considering new ideas and perspectives from others having the same challenges
